# Supplementary material for: Near-infrared luminescence of periodic mesoporous organosilicas grafted with lanthanide complexes based on visible-light sensitization
Source: Royal Society of Chemistry journal article supplement (doi:10.1039/c2jm15158h), 2012-01-01
Supplement: c2jm15158h.pdf [file c2jm15158h.pdf]

## Supporting information on

# Near-infrared luminescence of periodic mesoporous organosilicas grafting with lanthanide complexes based on visible-light sensitization

Lining Sun,<sup>\*a</sup> Wenpeng Mai,<sup>b</sup> Song Dang,<sup>b</sup> Yannan Qiu,<sup>a</sup> Wei Deng,<sup>a</sup> Liyi Shi,<sup>\*a</sup> Wei Yan<sup>a</sup> and  
Hongjie Zhang<sup>\*b</sup>

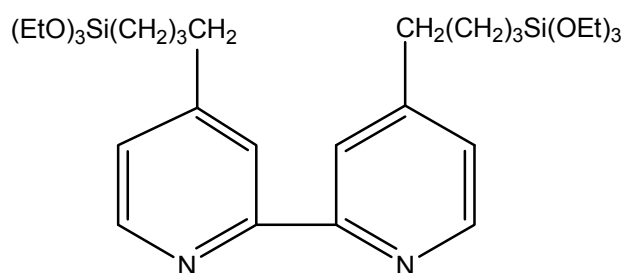

**Fig. S1.** Molecular structure of the dual-functional ligand bpd-Si.

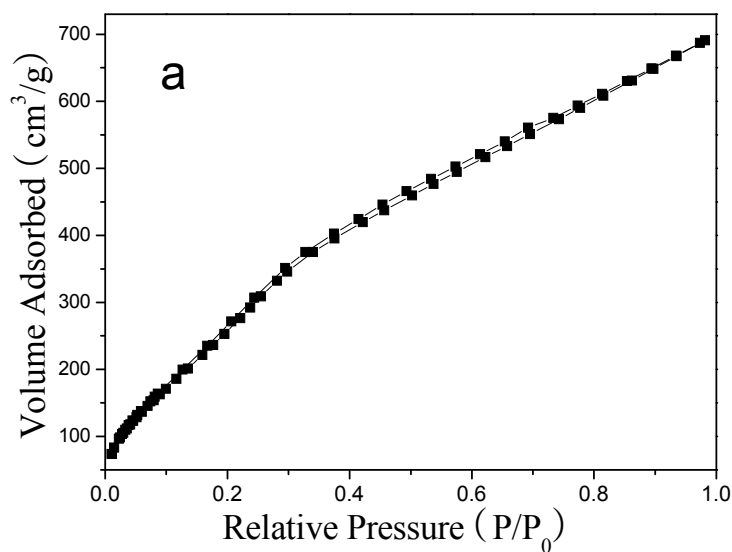

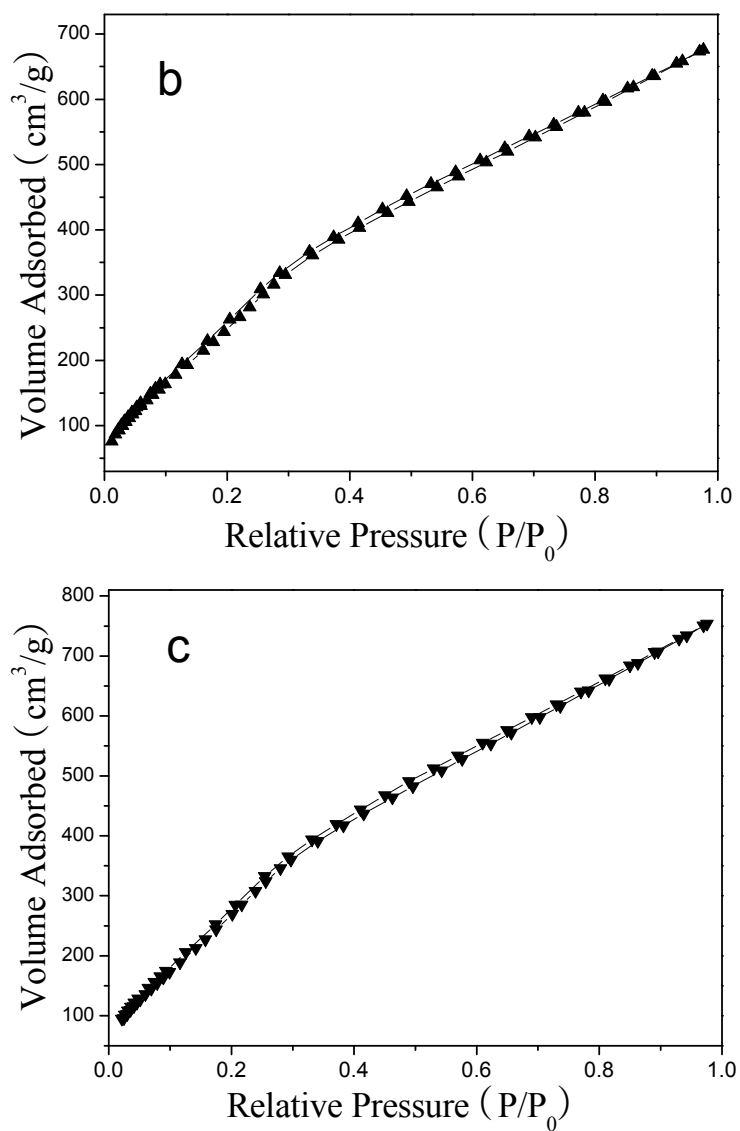

**Fig. S2.** N<sub>2</sub> adsorption-desorption isotherms of Er(dbm)<sub>3</sub>bpd-PMO (a), Yb(dbm)<sub>3</sub>bpd-PMO (b), Nd(dbm)<sub>3</sub>bpd-PMO (c).

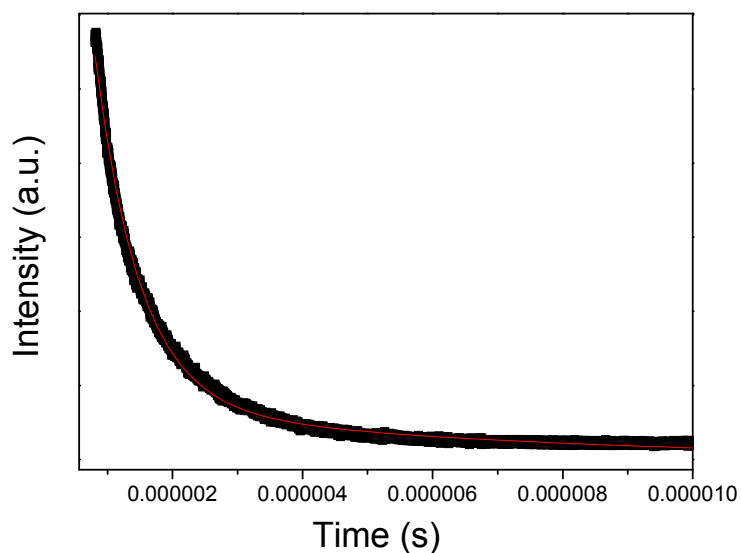

**Fig. S3.** The decay curve of the Er(dbm)<sub>3</sub>bpd-PMO, which corresponds to a double-exponential function ( $\lambda_{\text{exc}} = 355 \text{ nm}$ ,  $\lambda_{\text{em}} = 1533 \text{ nm}$ ).

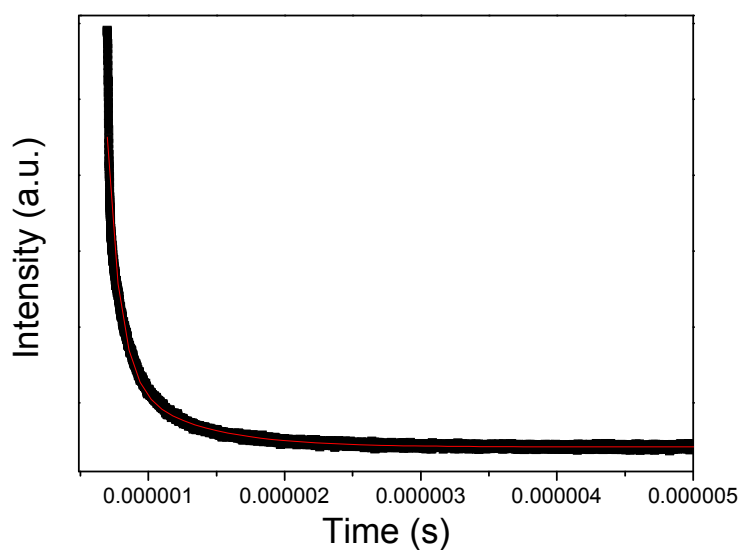

**Fig. S4.** The luminescence decay of the Nd(dbm)<sub>3</sub>bpd-PMO to demonstrate the double exponentiality of the decay ( $\lambda_{\text{exc}} = 355 \text{ nm}$ ,  $\lambda_{\text{em}} = 1062 \text{ nm}$ ).

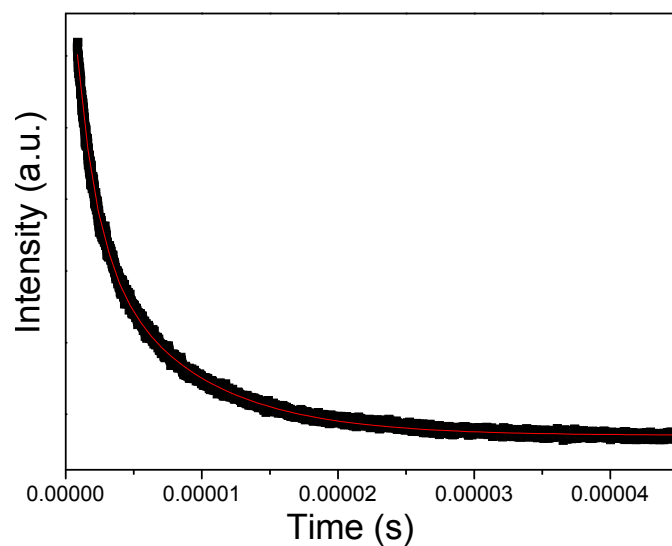

**Fig. S5.** The decay curve of the Yb(dbm)<sub>3</sub>bpd-PMO, which corresponds to a double-exponential function ( $\lambda_{\text{exc}} = 355 \text{ nm}$ ,  $\lambda_{\text{em}} = 980 \text{ nm}$ ).
